# Supplementary material
Source: HighWire-hosted journal article supplement (https://jech.bmj.com/content/suppl/2004/07/05/58.7.558)
Supplement: 587558Appendix.pdf [file 587558Appendix.pdf]

## Appendix: Exposure to risk situations while in theatre

| Were you in contact with:                                                             | Gulf | Bosnia | Kosov |
|---------------------------------------------------------------------------------------|------|--------|-------|
|                                                                                       |      |        | 0     |
| Smoke from oil well fires                                                             |      |        |       |
| Exhaust from heaters or generators (e.g. kerosene heaters)                            |      |        |       |
| Diesel and/or other petrochemical fumes                                               |      |        |       |
| Diesel or other petrochemical fuel <i>on your skin</i>                                |      |        |       |
| Burning rubbish or faeces                                                             |      |        |       |
| CARC (Chemical Agent Resistant Compound) paint                                        |      |        |       |
| Other paints, solvents, or petrochemical substances                                   |      |        |       |
| Personal pesticides (e.g. creams, sprays, or flea collars)                            |      |        |       |
| Pesticides on your clothing or bedding                                                |      |        |       |
| Chemical/Nerve gas attack                                                             |      |        |       |
| Mustard gas or other blistering agents                                                |      |        |       |
| Food contaminated with smoke, oil, or other chemicals                                 |      |        |       |
| Local food other than food provided by the Armed Forces                               |      |        |       |
| Dead animals                                                                          |      |        |       |
| Bathe in or drink water contaminated with smoke, oil, or other chemicals              |      |        |       |
| Bathe or swim in the local pond, or river                                             |      |        |       |
| Suffer from heat cramps, heat exhaustion, heat stroke, or other heat illnesses        |      |        |       |
| Suffer a combat related injury that required medical attention during your deployment |      |        |       |
| See any dismembered, burnt or otherwise disfigured bodies                             |      |        |       |

---

See any maimed or seriously injured soldiers

Witness anyone dying

Wear NBC suits

Have a SCUD missile explode in the air or on the ground  
within one mile of you

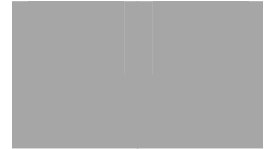

Have artillery, rockets, mortars, or anything else, other than  
SCUD missiles, explode in the air or on the ground close to  
you

Come under small arms fire

Hear chemical alarms sounding

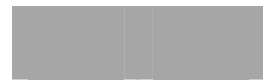

Handle or come into contact with POWs/displaced refugees

---
